# Supplementary material for: The small RNA mascRNA differentially regulates TLR-induced proinflammatory and antiviral responses
Source: JCI journal article supplement (doi:10.1172/jci.insight.150833), 2021-09-28
Supplement: sd1 [file 1]

You are being redirected.
